# Supplementary material for: Post-lithiation: a way to control the ionic conductivity of solid-state thin film electrolyte
Source: Royal Society of Chemistry journal article supplement (doi:10.1039/d3ma00894k), 2023-01-01
Supplement: d3ma00894k1.pdf [file d3ma00894k1.pdf]

## Supplementary Materials

### Post-lithiation: A way to control the ionic conductivity of solid-state thin film electrolyte

Jixi Chen,<sup>\*a</sup> Alessandro Palliotto,<sup>a</sup> Shinhee Yun,<sup>a</sup> Dennis Valbjørn Christensen,<sup>a</sup> Vincenzo Esposito,<sup>a</sup> and Nini Pryds<sup>\*a</sup>

Fig. S1-S4 are the GIXRD patterns of the as-deposited films.

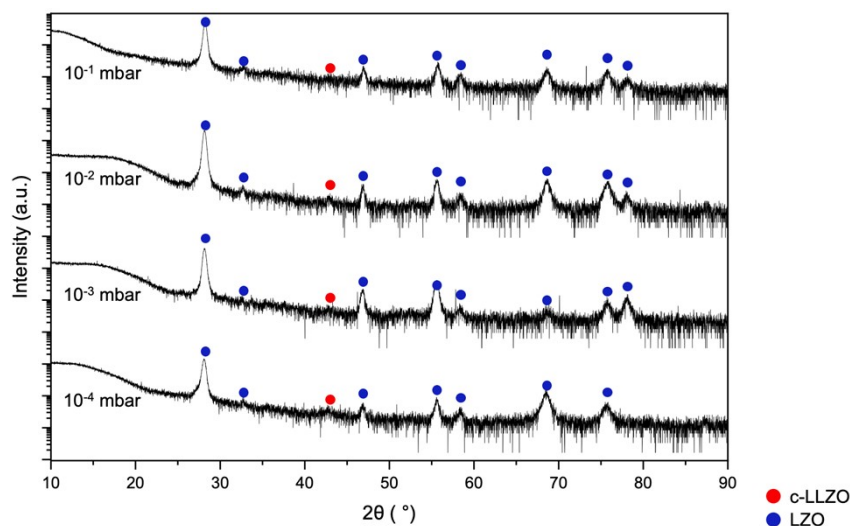

**Fig. S1** GIXRD patterns of the films deposited under various oxygen pressures, the deposition temperature is kept at 700 °C and with a laser energy density of 1 J cm<sup>-2</sup>. The phases of the films are almost the same while changing the oxygen pressure.

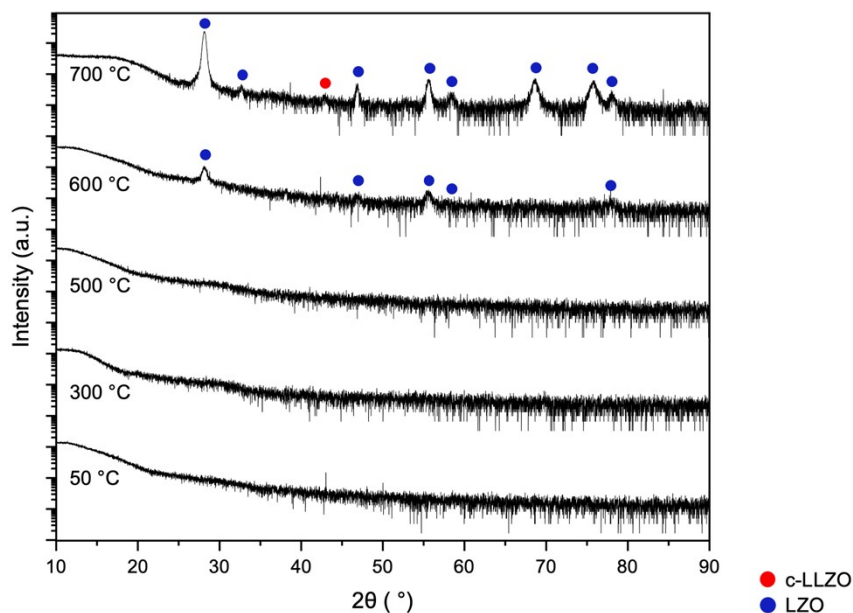

**Fig. S2** GIXRD patterns of the films deposited from 50 °C to 700 °C, the oxygen pressure is kept at 1 mbar and with a laser energy density of 1 J cm<sup>-2</sup>. The films are amorphous until the deposition temperature reaches 600 °C. Some LZO peaks start to show up at 600 °C, and more intense LZO peaks can be seen at 700 °C. The conclusion is that c-LLZO cannot be grown as-deposited at the specified pressure and laser fluence.

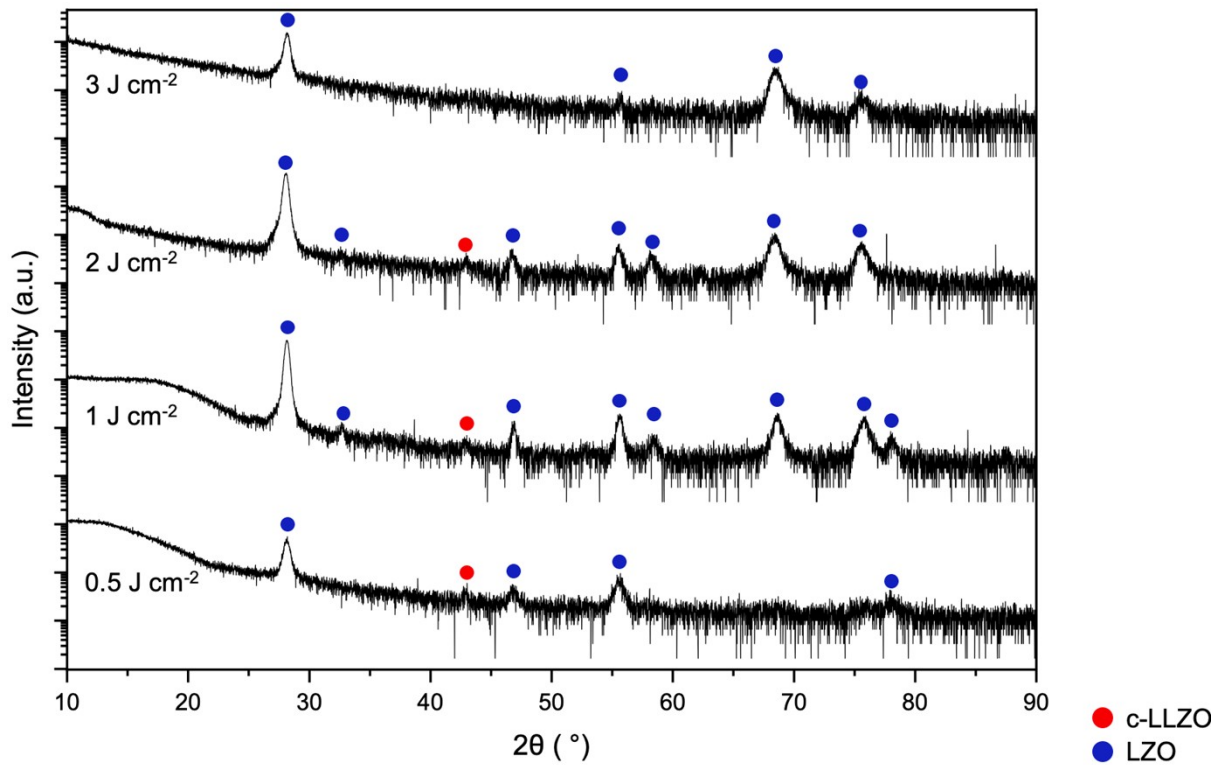

**Fig. S3** GIXRD patterns of the films were deposited with a laser energy density of  $1 \text{ J cm}^{-2}$ , and the deposition temperature was kept at  $700 \text{ }^\circ\text{C}$  with an oxygen pressure of 1 mbar. The phase of the films did not change too much when changing the laser fluence from  $0.5$  to  $3 \text{ J cm}^{-2}$ .

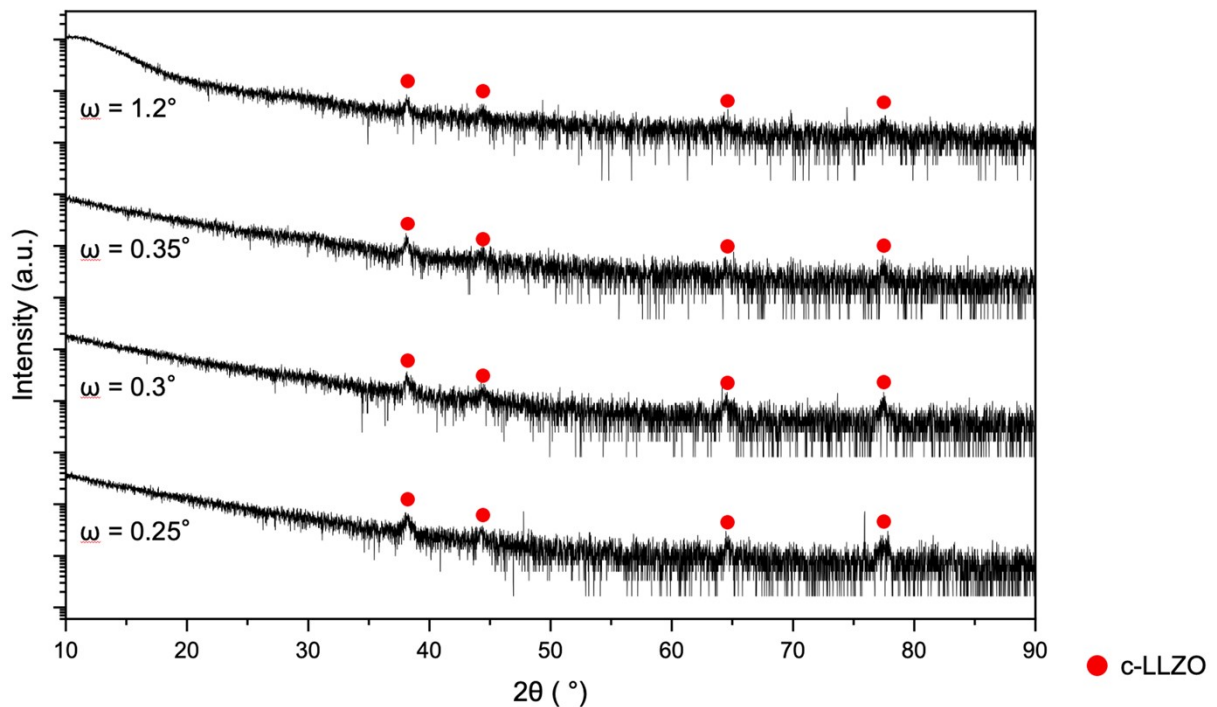

**Fig. S4** GIXRD patterns of the films deposited at  $50 \text{ }^\circ\text{C}$ , with a laser energy density of  $1 \text{ J cm}^{-2}$  and an oxygen pressure of 1 mbar. The intensity of the peaks started to decrease when the incident angle reached  $0.3^\circ$ , thus the thickness of the c-LLZO film is equivalent to the penetration depth of the X-ray with an incident angle of  $0.3^\circ$  applied on LLZO.

Fig. S5-S8 are the GIXRD patterns of the post-lithiated films.

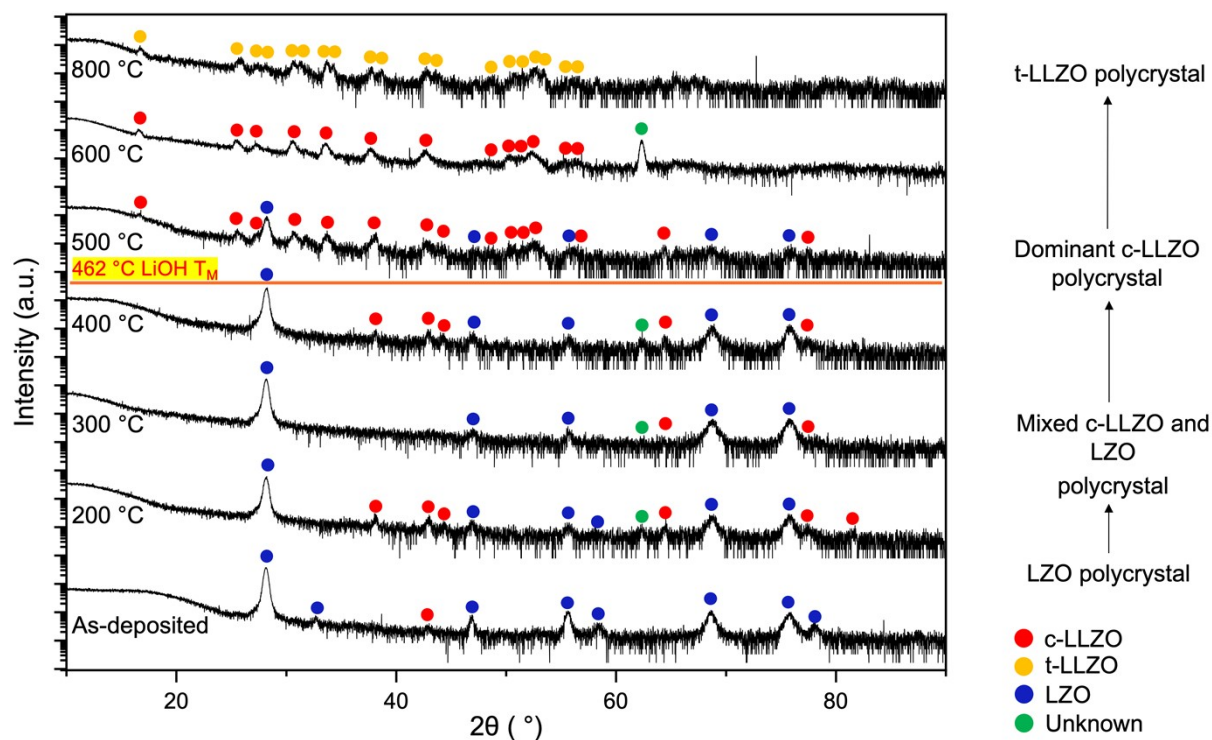

Fig. S5 GIXRD patterns of the films deposited at 700 °C then annealed with LiOH at various temperatures. The main phase of the film started from LZO polycrystal as-deposited to a mixed phase of LZO and c-LLZO at 500 °C (when the temperature reaches above the melting point of LiOH), then changed to a c-LLZO dominant phase at 600 °C. t-LLZO is the main phase at 800 °C.

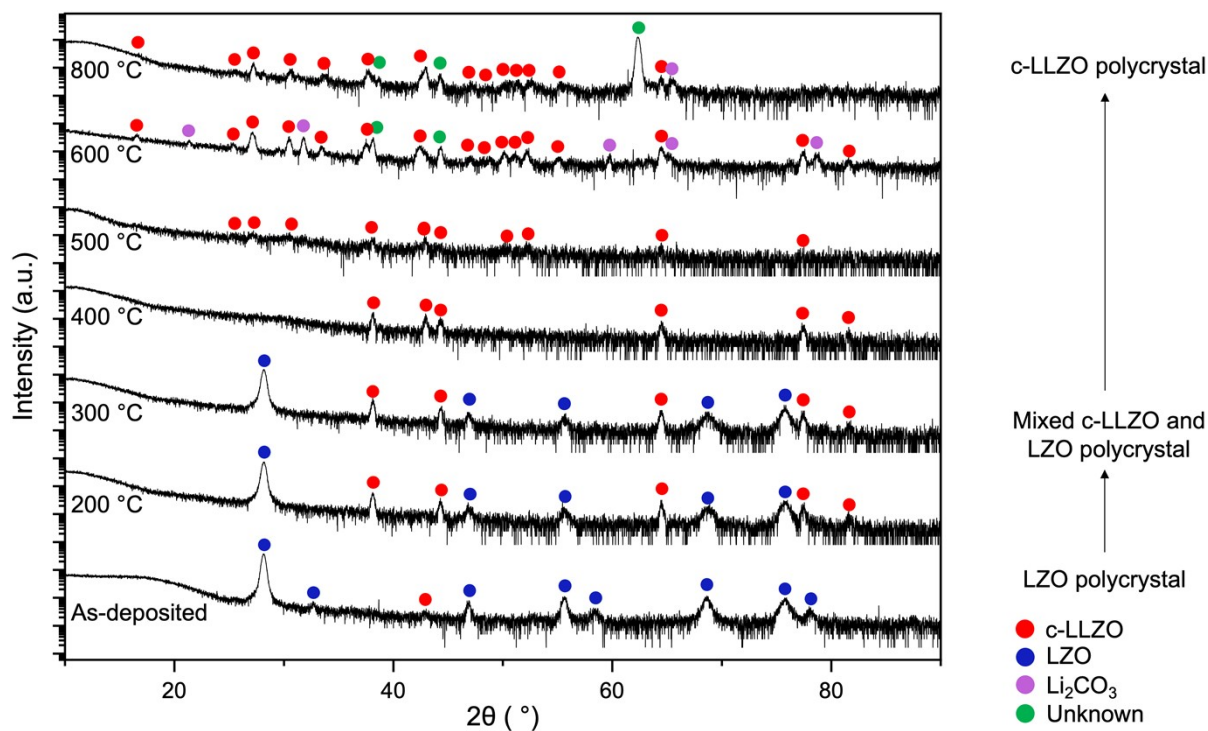

Fig. S6 GIXRD patterns of the films deposited at 700 °C then annealed with Li<sub>2</sub>O at various temperatures. The dominant phase was LZO polycrystal as-deposited, at 200 °C, the film has a mixed phase of c-LLZO and LZO. A c-LLZO dominant phase can be seen from 500 °C.

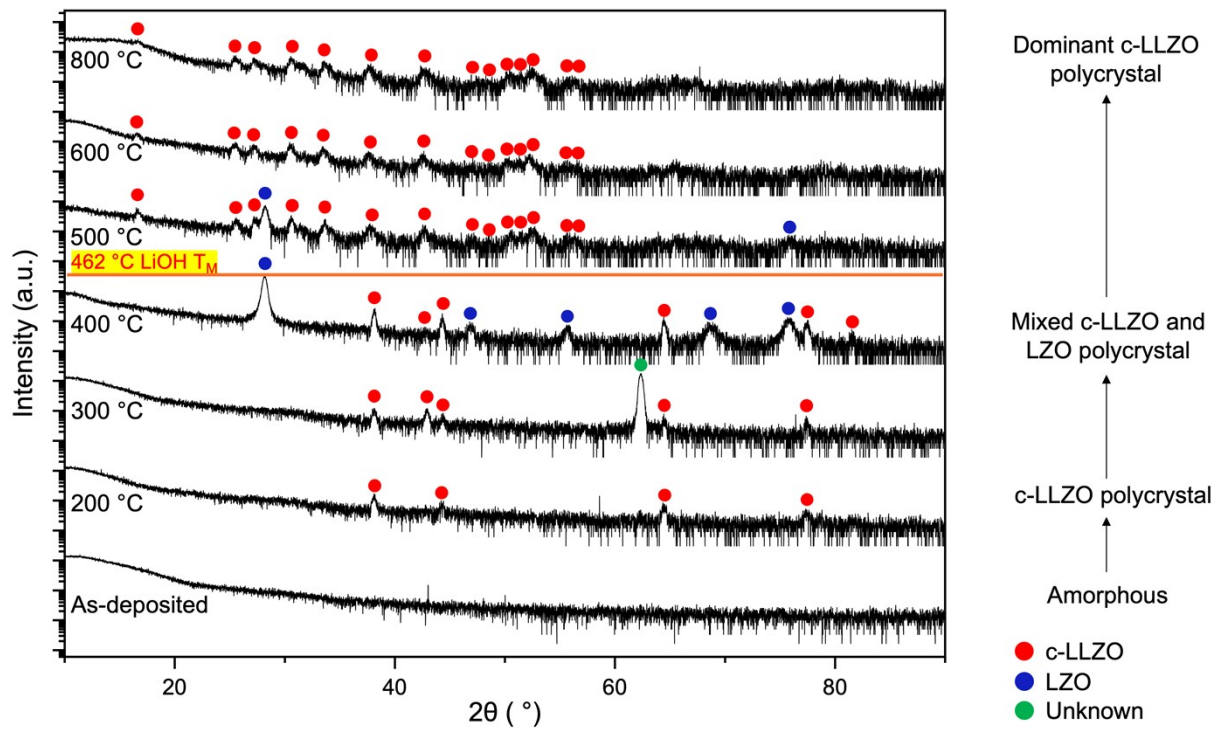

**Fig. S7** GIXRD patterns of the films deposited at 50 °C then annealed with LiOH at various temperatures. The film started to be amorphous as-deposited, and then some c-LLZO peaks started to appear from 200 °C. At 400 °C, LZO starts to show up which is an indicator of lithium loss. However, when the temperature reaches above the melting point of LiOH (462 °C), the tendency of Li-loss is reversed, and c-LLZO dominates the film again.

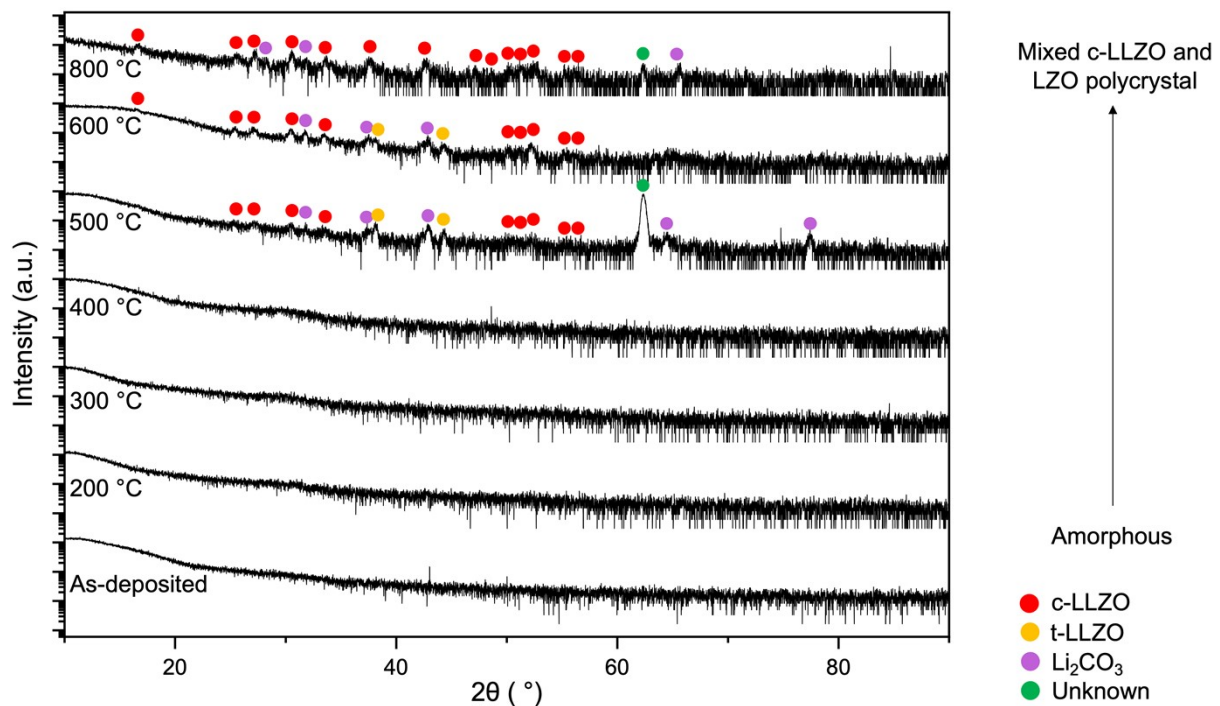

**Fig. S8** GIXRD patterns of the films deposited at 50 °C then annealed with  $\text{Li}_2\text{O}$  at various temperatures. The film appeared to be amorphous until the temperature reached 500 °C. c-LLZO phase started to appear from 500 °C.

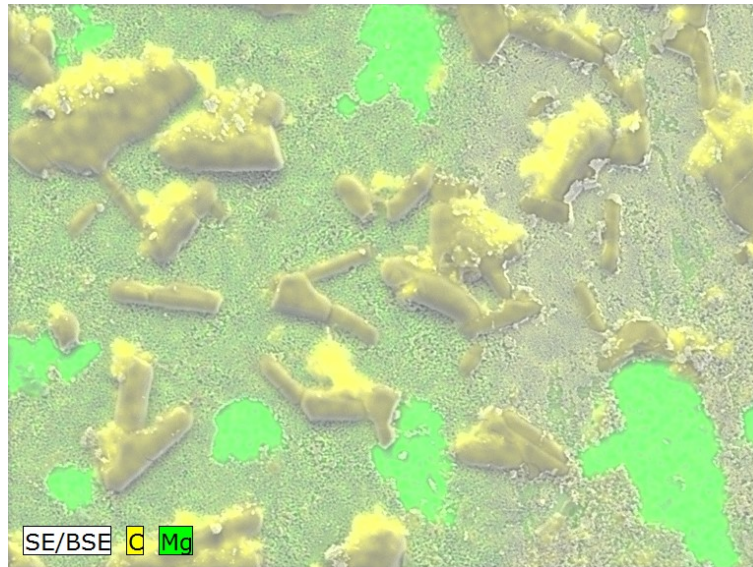

**Fig. S9** EDX image of the film deposited at 50 °C with a laser energy density of 1 J cm<sup>-2</sup> and an oxygen pressure of 1 mbar, then annealed at 600 °C with Li<sub>2</sub>O powder. The carbon-rich particles are presumably Li<sub>2</sub>CO<sub>3</sub>, and the Mg-rich parts are the films exfoliated by exposing the MgO substrate. Lithium cannot be detected directly with EDX, so carbon was used as an indicator for the presence of lithium.

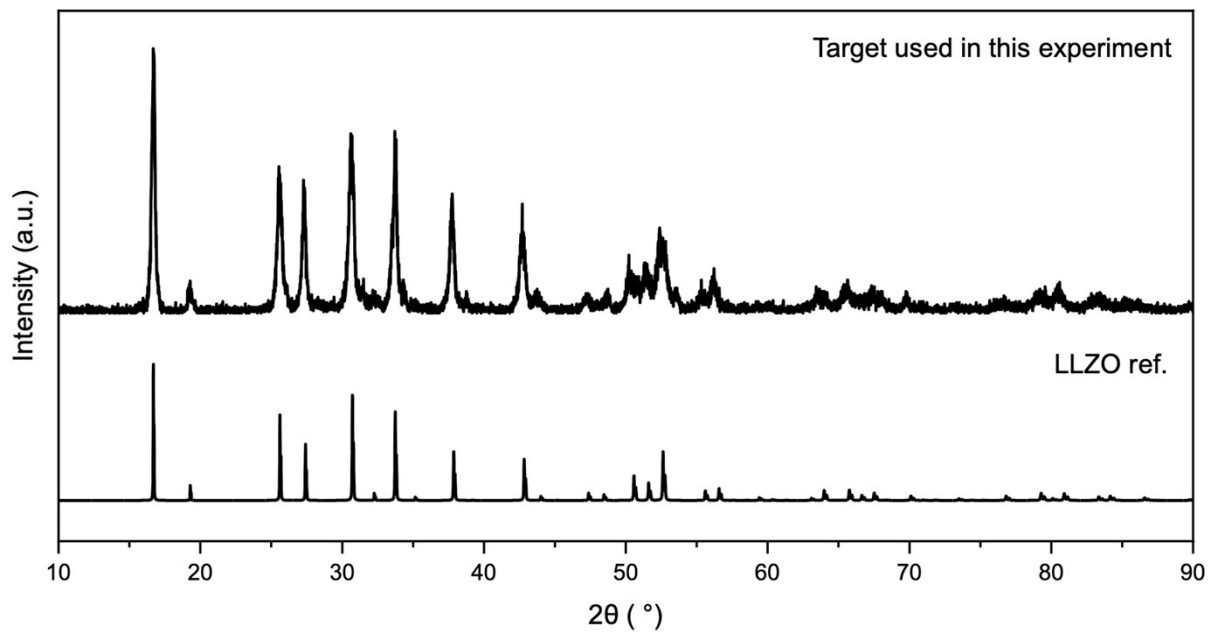

**Fig. S10** XRD pattern of the LLZO target used in this study, along with the LLZO reference pattern (PDF Card No: 00-063-0174).

**Fig. S11-S12** are pictures of the crucible used for the annealing process.

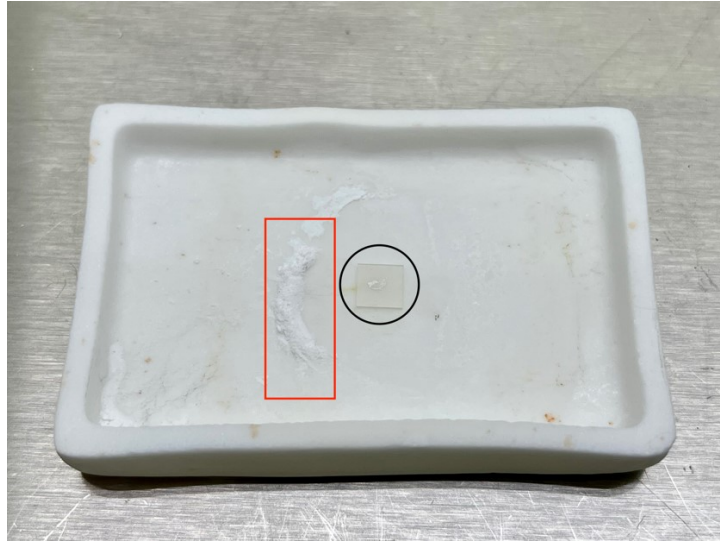

**Fig. S11** A picture showing how the powder was dispersed for the post-annealing process. The  $\text{Li}_2\text{O}$  powder is on the left (upstream of the  $\text{O}_2$  gas flow) and the film/substrate is on the right.

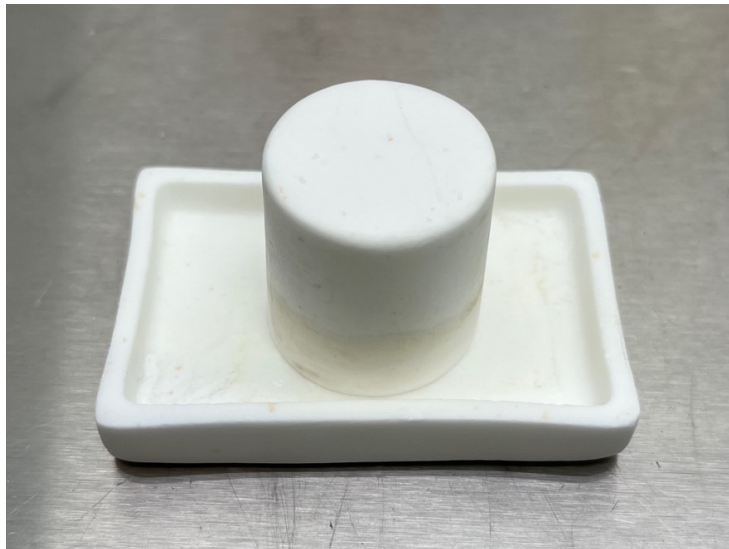

**Fig. S12** A picture of the crucible and the lid which covers the powder and the film.
